# Supplementary material
Source: HighWire-hosted journal article supplement (https://bmjopen.bmj.com/content/14/1/e074443)
Supplement: inline-supplementary-material-1 [file inline-supplementary-material-1.pdf]

## SUPPLEMENTAL MATERIAL

### Appendix 1: Preliminary search results for scoping reviews and systematic reviews in topic area

Table A1: Search results from 9<sup>th</sup> December 2022

| Search number | Query                                                                                              | Filters | Search Details                                                                                                                                                                                                                                                                                                                                                                                                                                                                                    | Results | Time     |
|---------------|----------------------------------------------------------------------------------------------------|---------|---------------------------------------------------------------------------------------------------------------------------------------------------------------------------------------------------------------------------------------------------------------------------------------------------------------------------------------------------------------------------------------------------------------------------------------------------------------------------------------------------|---------|----------|
| 7             | (#5) OR (#6)                                                                                       |         | ((("diabetes mellitus"[MeSH Terms] OR "diabetes insipidus"[MeSH Terms]) AND "scoping review"[Title/Abstract] AND "covid"[Title/Abstract]) OR ("hypertension"[MeSH Terms] AND "scoping review"[Title/Abstract] AND "covid"[Title/Abstract]) OR (((("diabetes mellitus"[MeSH Terms] OR "diabetes insipidus"[MeSH Terms]) AND "systematic review"[Title/Abstract] AND "covid"[Title/Abstract]) OR ("hypertension"[MeSH Terms] AND "systematic review"[Title/Abstract] AND "covid"[Title/Abstract]))) | 181     | 06:11:58 |
| 6             | (#2) OR (#4)                                                                                       |         | ((("diabetes mellitus"[MeSH Terms] OR "diabetes insipidus"[MeSH Terms]) AND "systematic review"[Title/Abstract] AND "covid"[Title/Abstract]) OR ("hypertension"[MeSH Terms] AND "systematic review"[Title/Abstract] AND "covid"[Title/Abstract]))                                                                                                                                                                                                                                                 | 175     | 06:11:43 |
| 5             | (#1) OR (#3)                                                                                       |         | ((("diabetes mellitus"[MeSH Terms] OR "diabetes insipidus"[MeSH Terms]) AND "scoping review"[Title/Abstract] AND "covid"[Title/Abstract]) OR ("hypertension"[MeSH Terms] AND "scoping review"[Title/Abstract] AND "covid"[Title/Abstract]))                                                                                                                                                                                                                                                       | 7       | 06:11:29 |
| 4             | ((hypertension[MeSH Terms]) AND ("systematic review"[Title/Abstract])) AND (covid[Title/Abstract]) |         | "hypertension"[MeSH Terms] AND "systematic review"[Title/Abstract] AND "covid"[Title/Abstract]                                                                                                                                                                                                                                                                                                                                                                                                    | 85      | 05:54:24 |
| 3             | ((hypertension[MeSH Terms]) AND ("scoping review"[Title/Abstract])) AND (covid[Title/Abstract])    |         | "hypertension"[MeSH Terms] AND "scoping review"[Title/Abstract] AND "covid"[Title/Abstract]                                                                                                                                                                                                                                                                                                                                                                                                       | 4       | 05:53:38 |
| 2             | ((diabetes[MeSH Terms]) AND ("systematic review"[Title/Abstract])) AND (covid[Title/Abstract])     |         | ("diabetes mellitus"[MeSH Terms] OR "diabetes insipidus"[MeSH Terms]) AND "systematic review"[Title/Abstract] AND "covid"[Title/Abstract]                                                                                                                                                                                                                                                                                                                                                         | 135     | 05:40:10 |
| 1             | ((diabetes[MeSH Terms]) AND ("scoping review"[Title/Abstract])) AND (covid[Title/Abstract])        |         | ("diabetes mellitus"[MeSH Terms] OR "diabetes insipidus"[MeSH Terms]) AND "scoping review"[Title/Abstract] AND "covid"[Title/Abstract]                                                                                                                                                                                                                                                                                                                                                            | 4       | 05:39:24 |

## Appendix 2: PRISMA-ScR Checklist adherence in this protocol

Table A2: Adapted PRISMA-ScR Checklist

| Section                          | Item | PRISMA-ScR Checklist Item                                                                                                                                                                                                                                                                                  | Reported on page #                        |
|----------------------------------|------|------------------------------------------------------------------------------------------------------------------------------------------------------------------------------------------------------------------------------------------------------------------------------------------------------------|-------------------------------------------|
| <b>TITLE</b>                     |      |                                                                                                                                                                                                                                                                                                            |                                           |
| Title                            | 1    | Identify the report as a scoping review.                                                                                                                                                                                                                                                                   | 1                                         |
| <b>ABSTRACT</b>                  |      |                                                                                                                                                                                                                                                                                                            |                                           |
| Structured Summary               | 2    | Provide a structured summary that includes (as applicable) background, objectives, eligibility criteria, sources of evidence, charting methods, results, and conclusions that relate to the review questions and objectives.                                                                               | 3                                         |
| <b>INTRODUCTION</b>              |      |                                                                                                                                                                                                                                                                                                            |                                           |
| Rationale                        | 3    | Describe the rationale for the review in the context of what is already known. Explain why the review questions/objectives lend themselves to a scoping review approach.                                                                                                                                   | 5-7                                       |
| Objectives                       | 4    | Provide an explicit statement of the questions and objectives being addressed with reference to their key elements (e.g., population or participants, concepts, and context) or other relevant key elements used to conceptualize the review questions and/or objectives.                                  | 7                                         |
| <b>METHODS</b>                   |      |                                                                                                                                                                                                                                                                                                            |                                           |
| Protocol and registration        | 5    | Indicate whether a review protocol exists; state if and where it can be accessed (e.g., a Web address); and if available, provide registration information, including the registration number.                                                                                                             | N/A for protocol, but link to OSF on p. 7 |
| Eligibility criteria             | 6    | Specify characteristics of the sources of evidence used as eligibility criteria (e.g., years considered, language, and publication status), and provide a rationale.                                                                                                                                       | 9-11                                      |
| Information sources              | 7    | Describe all information sources in the search (e.g., databases with dates of coverage and contact with authors to identify additional sources), as well as the date the most recent search was executed.                                                                                                  | 11                                        |
| Search                           | 8    | Present the full electronic search strategy for at least 1 database, including any limits used, such that it could be repeated.                                                                                                                                                                            | Appendix A3 in Supplemental Material      |
| Selection of sources of evidence | 9    | State the process for selecting sources of evidence (i.e., screening and eligibility) included in the scoping review.                                                                                                                                                                                      | 12                                        |
| Data charting process            | 10   | Describe the methods of charting data from the included sources of evidence (e.g., calibrated forms or forms that have been tested by the team before their use, and whether data charting was done independently or in duplicate) and any processes for obtaining and confirming data from investigators. | 12                                        |

|                                                      |    |                                                                                                                                                                                                       |                  |
|------------------------------------------------------|----|-------------------------------------------------------------------------------------------------------------------------------------------------------------------------------------------------------|------------------|
| Data items                                           | 11 | List and define all variables for which data were sought and any assumptions and simplifications made.                                                                                                | 13-14            |
| Critical appraisal of individual sources of evidence | 12 | If done, provide a rationale for conducting a critical appraisal of included sources of evidence; describe the methods used and how this information was used in any data synthesis (if appropriate). | 14               |
| Summary measures                                     | 13 | Not applicable for scoping reviews.                                                                                                                                                                   | N/A              |
| Synthesis of results                                 | 14 | Describe the methods of handling and summarizing the data that were charted.                                                                                                                          | 14-15            |
| Risk of bias across studies                          | 15 | Not applicable for scoping reviews.                                                                                                                                                                   | N/A              |
| Additional analyses                                  | 16 | Not applicable for scoping reviews.                                                                                                                                                                   | N/A              |
| <b>RESULTS</b>                                       |    |                                                                                                                                                                                                       |                  |
| Selection of sources of evidence                     | 17 | Give numbers of sources of evidence screened, assessed for eligibility, and included in the review, with reasons for exclusions at each stage, ideally using a flow diagram.                          | N/A for protocol |
| Characteristics of sources of evidence               | 18 | For each source of evidence, present characteristics for which data were charted and provide the citations.                                                                                           | N/A for protocol |
| Critical appraisal within sources of evidence        | 19 | If done, present data on critical appraisal of included sources of evidence (see item 12).                                                                                                            | N/A for protocol |
| Results of individual sources of evidence            | 20 | For each included source of evidence, present the relevant data that were charted that relate to the review questions and objectives.                                                                 | N/A for protocol |
| Synthesis of results                                 | 21 | Summarize and/or present the charting results as they relate to the review questions and objectives.                                                                                                  | N/A for protocol |
| Risk of bias across studies                          | 22 | Not applicable for scoping reviews.                                                                                                                                                                   | N/A              |
| Additional analyses                                  | 23 | Not applicable for scoping reviews.                                                                                                                                                                   | N/A              |
| <b>DISCUSSION</b>                                    |    |                                                                                                                                                                                                       |                  |
| Summary of evidence                                  | 24 | Summarize the main results (including an overview of concepts, themes, and types of evidence available), link to the review questions and objectives, and consider the relevance to key groups.       | N/A for protocol |
| Limitations                                          | 25 | Discuss the limitations of the scoping review process.                                                                                                                                                | N/A for protocol |
| Conclusions                                          | 26 | Provide a general interpretation of the results with respect to the review questions and objectives, as well as potential implications and/or next steps.                                             | N/A for protocol |
| <b>FUNDING</b>                                       |    |                                                                                                                                                                                                       |                  |
| Funding                                              | 27 | Describe sources of funding for the included sources of evidence, as well as sources of funding for the scoping review. Describe the role of the funders of the scoping review.                       | 20               |

Adapted from: Tricco AC, Lillie E, Zarin W, O'Brien KK, Colquhoun H, Levac D, et al. PRISMA Extension for Scoping Reviews (PRISMA-ScR): Checklist and Explanation. *Annals of Internal Medicine*. 2018;169(7):467-73. DOI: 10.7326/M18-0850

Adaptations are highlighted in yellow.

## Appendix 3: Full list of search terms used in this scoping review

Table A3: Search terms in PubMed, run 12<sup>th</sup> December 2022

|    |                                                                                                                                                                                                                                                                                                                                                                                                                                                                                                                                                                                                                                                                                                                                                                                                                                                                                                                                                                                                                                                                                                                                                                                                                                                                                                                                                                                                                                                                                                                                                                                                                                                                                                                                                                                                                                                                                                                                               |
|----|-----------------------------------------------------------------------------------------------------------------------------------------------------------------------------------------------------------------------------------------------------------------------------------------------------------------------------------------------------------------------------------------------------------------------------------------------------------------------------------------------------------------------------------------------------------------------------------------------------------------------------------------------------------------------------------------------------------------------------------------------------------------------------------------------------------------------------------------------------------------------------------------------------------------------------------------------------------------------------------------------------------------------------------------------------------------------------------------------------------------------------------------------------------------------------------------------------------------------------------------------------------------------------------------------------------------------------------------------------------------------------------------------------------------------------------------------------------------------------------------------------------------------------------------------------------------------------------------------------------------------------------------------------------------------------------------------------------------------------------------------------------------------------------------------------------------------------------------------------------------------------------------------------------------------------------------------|
| #1 | <p>("Coronavirus Infections"[Mesh] OR "COVID-19"[Mesh] OR "SARS-CoV-2"[Mesh] OR "Coronavirus"[Mesh] OR "Betacoronavirus"[Mesh] OR "COVID-19 Testing"[Mesh] OR "COVID-19 Vaccines"[Mesh] OR ("COVID-19"[tw] OR "COVID 19"[tw] OR "COVID19"[tw] OR "COVID2019"[tw] OR "COVID 2019"[tw] OR "COVID-2019"[tw] OR "novel coronavirus"[tw] OR "new coronavirus"[tw] OR "novel corona virus"[tw] OR "new corona virus"[tw] OR "SARS-CoV-2"[tw] OR "SARSCoV2"[tw] OR "SARS-CoV2"[tw] OR "2019nCoV"[tw] OR "2019-nCoV"[tw] OR "2019 coronavirus"[tw] OR "2019 corona virus"[tw] OR "coronavirus disease 2019"[tw] OR "corona virus disease 2019"[tw] OR "severe acute respiratory syndrome coronavirus 2"[tw] OR "sars-coronavirus-2"[tw] OR "SARS Coronavirus 2"[tw] OR "coronavirus disease 19"[tw] OR "corona virus disease 19"[tw]) OR (coronavirus[tw] OR "corona virus"[tw] OR coronavirinae[tw] OR coronaviridae[tw] OR betacoronavirus[tw] OR nCoV[tw] OR "CoV 2"[tw] OR CoV2[tw] OR sarscov2[tw] OR "novel CoV"[tw] OR "wuhan virus"[tw]) OR ((wuhan[tw] OR hubei[tw] OR huanan[tw]) AND ("severe acute respiratory"[tw] OR pneumonia[tw]) AND (outbreak[tw])))</p>                                                                                                                                                                                                                                                                                                                                                                                                                                                                                                                                                                                                                                                                                                                                                                            |
| #2 | <p>"Primary Health Care"[Mesh] OR "General Practice"[Mesh] OR "General Practitioners"[Mesh] OR "Health Services"[Mesh] OR "Primary Health Care"[Mesh] OR "Physicians, Primary Care"[Mesh] OR "Ambulatory Care"[Mesh] OR "Continuity of Patient Care"[Mesh] OR "Health Policy"[Mesh] OR "Delivery of Health Care"[Mesh] OR "first level of care"[tiab] OR "primary care"[tiab] OR "primary health care"[tiab] OR "general practice"[tiab] OR "general practitioner*"[tiab] OR "health service*"[tiab] OR "ambulatory care"[tiab] OR "continuity of patient care"[tiab] OR "continuity of care"[tiab] OR "healthcare system*"[tiab] OR "health care system*"[tiab] OR "health policy"[tiab] OR "health policies"[tiab] OR "healthcare policy"[tiab] OR "healthcare policies"[tiab]</p> <p>OR</p> <p>"Disease Management"[Mesh] OR "Self-Management"[Mesh] OR "Self Care"[Mesh] OR "disease management"[tiab] OR "self-manag*"[tiab] OR "self-care"[tiab] OR "care, self"[tiab] OR "self-treat*"[tiab] OR "self-test*"[tiab] OR "self-medicat*"[tiab] OR "self-monitor*"[tiab] OR "self-diagnos*"[tiab] OR "self-efficacy"[tiab] OR "self-competen*"[tiab]</p> <p>OR</p> <p>"Quality of Health Care"[Mesh] OR "Patient Acceptance of Health Care"[Mesh] OR "Patient Care Management"[Mesh] OR "Universal Health Care"[Mesh] OR "Facilities and Services Utilization"[Mesh] OR "Management Information Systems"[Mesh] OR "Quality of Health Care"[tiab] OR "healthcare quality"[tiab] OR "health care quality"[tiab] OR "Patient Acceptance of Health Care"[tiab] OR "Patient Acceptance of Healthcare"[tiab] OR "healthcare utilization"[tiab] OR "health care utilization"[tiab] OR "patient compliance"[tiab] OR "Facilities Utilization"[tiab] OR "Services Utilization"[tiab] OR "Patient Care"[tiab] OR "point of care"[tiab] OR "Universal Health Care"[tiab] OR "Universal Healthcare"[tiab] OR "Information Systems"[tiab]</p> <p>OR</p> |

|    |                                                                                                                                                                                                                                                                                                                                                                                                                                                                                                                                                                                                                                                                                                                                                                                                                                                                                                                                                                                                                                                                                                                                                                                                                                                                                                                                                                                                                                                                                                                                                                                                                                                                                                         |
|----|---------------------------------------------------------------------------------------------------------------------------------------------------------------------------------------------------------------------------------------------------------------------------------------------------------------------------------------------------------------------------------------------------------------------------------------------------------------------------------------------------------------------------------------------------------------------------------------------------------------------------------------------------------------------------------------------------------------------------------------------------------------------------------------------------------------------------------------------------------------------------------------------------------------------------------------------------------------------------------------------------------------------------------------------------------------------------------------------------------------------------------------------------------------------------------------------------------------------------------------------------------------------------------------------------------------------------------------------------------------------------------------------------------------------------------------------------------------------------------------------------------------------------------------------------------------------------------------------------------------------------------------------------------------------------------------------------------|
|    | <p>"Health Facilities"[Mesh] OR "Health Personnel"[Mesh] OR "Health Workforce"[Mesh] OR "Health Information Systems"[Mesh] OR "Budgets"[Mesh] OR "Financial Management, Hospital"[Mesh] OR "health facility"[tiab] OR "health facilities"[tiab] OR "health personnel"[tiab] OR "health care provider*"[tiab] OR "healthcare provider*"[tiab] OR "health care worker*"[tiab] OR "healthcare worker*"[tiab] OR "health care professional*"[tiab] OR "healthcare professional*"[tiab] OR "health workforce"[tiab] OR nurse*"[tiab] OR pharmacist*"[tiab] OR physician*"[tiab] OR medication[tiab] OR "drug supply"[tiab] OR "drug supplies"[tiab] OR health facilit*[tiab] OR medical facilit*[tiab] OR "facility infrastructure"[tiab] OR outpatient*"[tiab] OR budget*"[tiab] OR financial*"[tiab]</p> <p>OR</p> <p>"resilient health system*"[tiab] OR "sustainable health system*"[tiab] OR "health system sustainability"[tiab] OR "health system resilience"[tiab] OR "resilient health systems"[tiab] OR "patient centered care" [tiab] OR "patient acceptance"[tiab]</p>                                                                                                                                                                                                                                                                                                                                                                                                                                                                                                                                                                                                                           |
| #3 | <p>"Glucose Metabolism Disorders"[Mesh] OR "Glycogen Storage Disease"[Mesh] OR "Insulin Resistance"[Mesh] OR "Blood Glucose"[Mesh] OR "Glucose Tolerance Test"[Mesh] OR diabetes[tiab] OR diabetic*"[tiab] OR "glucose intoler*"[tiab] OR "glucose toler*"[tiab] OR "blood glucose"[tiab] OR "blood sugar*"[tiab] OR "elevated serum glucose level*"[tiab] OR hyperglycemia*"[tiab] OR hyperglucemia*"[tiab] OR hyperglycaemia*"[tiab] OR IDDM[tiab] OR MODY[tiab] OR NIDDM [tiab] OR T1DM[tiab] OR T2DM[tiab] OR prediabet*"[tiab] OR IIDM[tiab] OR "glycogen storage disease*"[tiab] OR glycogenoses[tiab] OR glycogenesis[tiab] OR "glycosylation disorder*"[tiab] OR "insulin coma*"[tiab] OR "insulin resistan*"[tiab] OR "insulin sensitivit*"[tiab] OR "insulin shock*"[tiab] OR "insulin independ*"[tiab]</p>                                                                                                                                                                                                                                                                                                                                                                                                                                                                                                                                                                                                                                                                                                                                                                                                                                                                                   |
| #4 | <p>"hypertension"[Mesh] OR "Prehypertension"[Mesh] OR "Blood Pressure"[Mesh] OR "Noncommunicable Diseases"[Mesh] OR "Antihypertensive Agents"[Mesh] OR "hypertension*"[tiab] OR "hyper tension*"[tiab] OR hypertensive*"[tiab] OR "blood pressure*"[tiab] OR prehypertens*"[tiab] OR systolic[tiab] OR systole[tiab] OR diastolic[tiab] OR diastole[tiab] OR "pulse pressure*"[tiab] OR "Noncommunicable Diseases"[tiab] OR "Non communicable Diseases"[tiab] OR "Antihypertensive*"[tiab]</p>                                                                                                                                                                                                                                                                                                                                                                                                                                                                                                                                                                                                                                                                                                                                                                                                                                                                                                                                                                                                                                                                                                                                                                                                          |
| #5 | <p>("Latin America"[Mesh] OR "Latin America*"[tw] OR "Caribbean Region"[Mesh] OR Caribbean*[tw] OR Aruba*[tw] OR Curacao*[tw] OR "Sint Maarten*"[tw] OR "West Indies*"[tw] OR Montserrat*[tw] OR Turks*[tw] OR Caicos*[tw] OR Cayman*[tw] OR Antigua*[tw] OR Barbuda*[tw] OR Bahamas*[tw] OR Barbados*[tw] OR "British Virgin Island*"[tw] OR Cuba*[tw] OR Dominica*[tw] OR Grenada*[tw] OR Guadeloupe*[tw] OR Haiti*[tw] OR Jamaica*[tw] OR Martinique*[tw] OR "Puerto Rico*"[tw] OR "Puerto Rican*"[tw] OR "Saint Kitts*"[tw] OR "St Kitts*"[tw] OR Nevis*[tw] OR "Saint Lucia*"[tw] OR "St Lucia*"[tw] OR "Saint Vincent*"[tw] OR "St Vincent*"[tw] OR Grenadines*[tw] OR Trinidad*[tw] OR Tobago*[tw] OR "Virgin Island*"[tw] OR "Saint Bart*"[tw] OR "St Bart*"[tw] OR "Central America"[Mesh] OR "Central America*"[tw] OR Belize*[tw] OR "Costa Rica*"[tw] OR "El Salvador*"[tw] OR Salvadorean*[tw] OR Salvadoran*[tw] OR Salvadorian*[tw] OR Guatemala*[tw] OR Honduras*[tw] OR Nicaragua*[tw] OR Panama*[tw] OR "South America"[Mesh] OR "South America*"[tw] OR Argentina*[tw] OR Argentine*[tw] OR Argentinian*[tw] OR Bolivia*[tw] OR Brazil*[tw] OR Brasil*[tw] OR Chile*[tw] OR Colombia*[tw] OR Ecuador*[tw] OR Guyana*[tw] OR Guiana*[tw] OR Paraguay*[tw] OR Peru*[tw] OR Suriname*[tw] OR Surinam*[tw] OR Uruguay*[tw] OR Venezuela*[tw] OR "Mexico"[Mesh] OR Mexico*[tw] OR Mexican*[tw] OR "Mexican Americans"[Mesh] OR "Hispanic or Latino"[Mesh] OR Hispanic*[tw] OR Hispano*[tw] OR Latin[tw] OR Latina*[tw] OR Latine*[tw] OR Latinu*[tw] OR Latino*[tw] OR Latinx*[tw] OR "Spanish speak*"[tw] OR "Spanish America*"[tw] OR Boricua*[tw] OR Chicana*[tw] OR Chicano*[tw])</p> |
| #6 | #1 AND (#2 OR #3 OR #4) AND #5 AND 2020 – present                                                                                                                                                                                                                                                                                                                                                                                                                                                                                                                                                                                                                                                                                                                                                                                                                                                                                                                                                                                                                                                                                                                                                                                                                                                                                                                                                                                                                                                                                                                                                                                                                                                       |

|    |                                                                                                                                                                                                                                                                  |
|----|------------------------------------------------------------------------------------------------------------------------------------------------------------------------------------------------------------------------------------------------------------------|
| #7 | "Health Care Reform"[Mesh] OR "health system recovery"[tiab] OR "post-pandemic"[tiab] OR "post-pandemic recovery"[tiab] OR "post-COVID-19 recovery"[tiab] OR "recovery plan*"[tiab] OR "health strategy*"[tiab] OR "reform"[tiab] OR "disruption recovery"[tiab] |
| #8 | #1 AND (#2 OR #3 OR #4) AND #7 AND 2020 – present                                                                                                                                                                                                                |
| #9 | #6 OR #8 Filters: from 2020 - 3000/12/12                                                                                                                                                                                                                         |

**Table A4: Search terms in Embase, run 12<sup>th</sup> December 2022**

|    |                                                                                                                                                                                                                                                                                                                                                                                                                                                                                                                                                                                                                                                                                                                                                                                                                                                                                                                                                                                                                                                                                                                                                                                                                                                                                                                                                                                                                                                                                                                                                                                                                           |
|----|---------------------------------------------------------------------------------------------------------------------------------------------------------------------------------------------------------------------------------------------------------------------------------------------------------------------------------------------------------------------------------------------------------------------------------------------------------------------------------------------------------------------------------------------------------------------------------------------------------------------------------------------------------------------------------------------------------------------------------------------------------------------------------------------------------------------------------------------------------------------------------------------------------------------------------------------------------------------------------------------------------------------------------------------------------------------------------------------------------------------------------------------------------------------------------------------------------------------------------------------------------------------------------------------------------------------------------------------------------------------------------------------------------------------------------------------------------------------------------------------------------------------------------------------------------------------------------------------------------------------------|
| #1 | ('Coronavirus infection'/exp OR 'coronavirus disease 2019'/exp OR 'Severe acute respiratory syndrome coronavirus 2'/exp OR 'Coronavirinae'/exp) OR ("COVID 19" OR "COVID-19" OR "COVID19" OR "COVID2019" OR "COVID 2019" OR "COVID-2019" OR "novel coronavirus" OR "new coronavirus" OR "novel corona virus" OR "new corona virus" OR "SARS-CoV-2" OR "SARSCoV2" OR "SARS-CoV2" OR "2019nCoV" OR "2019-nCoV" OR "2019 coronavirus" OR "2019 corona virus" OR "coronavirus disease 2019" OR "corona virus disease 2019" OR "severe acute respiratory syndrome coronavirus 2" OR "sars-coronavirus-2" OR "SARS Coronavirus 2" OR "coronavirus disease 19" OR "corona virus disease 19"):ab,ti,kw OR (coronavirus OR "corona virus" OR coronavirinae OR coronaviridae OR betacoronavirus OR nCoV OR "CoV 2" OR CoV2 OR sarscov2 OR "novel CoV" OR "wuhan virus"):ab,ti,kw OR ((wuhan OR hubei OR huanan):ab,ti,kw AND ("severe acute respiratory" OR pneumonia):ab,ti,kw AND (outbreak*:ab,ti,kw))                                                                                                                                                                                                                                                                                                                                                                                                                                                                                                                                                                                                                           |
| #2 | 'primary health care'/exp OR 'general practice'/exp OR 'general practitioner'/exp OR 'health service'/exp OR 'ambulatory care'/exp OR 'patient care'/exp OR 'health care policy'/exp OR 'health care delivery'/exp OR ("first level of care" OR "primary care" OR "primary health care" OR "general practice" OR "general practitioner*" OR "health service*" OR "ambulatory care" OR "continuity of patient care" OR "continuity of care" OR "healthcare system*" OR "health care system*" OR "health policy" OR "health policies" OR "healthcare policy" OR "healthcare policies"):ab,ti,kw<br><br>OR<br><br>'disease management'/exp OR 'self care'/exp OR 'self management support'/exp OR ("disease management" OR "self-manag*" OR "self-care" OR "care, self" OR "self-treat*" OR "self-test*" OR "self-medicat*" OR "self-monitor*" OR "self-diagnos*" OR "self-efficacy" OR "self-competen*"):ab,ti,kw<br><br>OR<br><br>'health care quality'/exp OR 'patient attitude'/exp OR 'health care utilization'/exp OR 'patient compliance'/exp OR 'facilities and services utilization'/exp OR 'point of care'/exp OR 'universal health care'/exp OR 'information system'/exp OR ("quality of health care" OR "healthcare quality" OR "health care quality" OR "patient acceptance of health care" OR "patient acceptance of healthcare" OR "healthcare utilization" OR "health care utilization" OR "patient compliance" OR "facilities utilization" OR "services utilization" OR "patient care" OR "point of care" OR "universal health care" OR "universal healthcare" OR "information systems"):ab,ti,kw<br><br>OR |

|    |                                                                                                                                                                                                                                                                                                                                                                                                                                                                                                                                                                                                                                                                                                                                                                                                                                                                                                                                                                                                                                                                                                                                                                                                                                                                                |
|----|--------------------------------------------------------------------------------------------------------------------------------------------------------------------------------------------------------------------------------------------------------------------------------------------------------------------------------------------------------------------------------------------------------------------------------------------------------------------------------------------------------------------------------------------------------------------------------------------------------------------------------------------------------------------------------------------------------------------------------------------------------------------------------------------------------------------------------------------------------------------------------------------------------------------------------------------------------------------------------------------------------------------------------------------------------------------------------------------------------------------------------------------------------------------------------------------------------------------------------------------------------------------------------|
|    | 'health care facility'/exp OR 'health care facilities and services'/exp OR 'health care personnel'/exp OR 'health workforce'/exp OR 'medical information system'/exp OR 'budget'/exp OR 'hospital finance'/exp OR ("health facility" OR "health facilities" OR "health personnel" OR "health care provider*" OR "healthcare provider*" OR "health care worker*" OR "healthcare worker*" OR "health care professional*" OR "healthcare professional*" OR "health workforce" OR nurse* OR pharmacist* OR physician* OR medication OR "drug supply" OR "drug supplies" OR "health facilit*" OR "medical facilit*" OR "facility infrastructure" OR outpatient* OR budget* OR financial*):ab,ti,kw<br><br>OR<br><br>("resilient health system*" OR "sustainable health system*" OR "health system sustainability" OR "health system resilience" OR "resilient health systems" OR "patient centered care" OR "patient acceptance"):ab,ti,ab                                                                                                                                                                                                                                                                                                                                          |
| #3 | 'disorders of carbohydrate metabolism'/exp OR 'glycogen storage disease'/exp OR 'insulin resistance'/exp OR 'glucose blood level'/exp OR 'glucose tolerance test'/exp OR (diabetes OR diabetic* OR "glucose intoler*" OR "glucose toler*" OR "blood glucose" OR "blood sugar*" OR "elevated serum glucose level*" OR hyperglycemia* OR hyperglucemia* OR hyperglycaemia* OR IDDM OR MODY OR NIDDM OR T1DM OR T2DM OR prediabet* OR IIDM OR "glycogen storage disease*" OR glycogenoses OR glycogenesis OR "glycosylation disorder*" OR "insulin coma*" OR "insulin resist*" OR "insulin sensitivit*" OR "insulin shock*" OR "insulin independ*"):ab,ti,kw                                                                                                                                                                                                                                                                                                                                                                                                                                                                                                                                                                                                                      |
| #4 | 'hypertension'/exp OR 'prehypertension'/exp OR 'blood pressure'/exp OR 'non communicable disease'/exp OR 'antihypertensive agent'/exp OR ("hypertension*" OR "hypertension*" OR hypertensive* OR "blood pressure*" OR prehypertens* OR systolic OR systole OR diastolic OR diastole OR "pulse pressure*" OR "noncommunicable diseases" OR "non communicable diseases" OR "antihypertensive*"):ab,ti,kw                                                                                                                                                                                                                                                                                                                                                                                                                                                                                                                                                                                                                                                                                                                                                                                                                                                                         |
| #5 | 'South and Central America'/exp OR 'Mexico'/exp OR 'Mexican American'/exp OR 'Hispanic'/exp OR ("Latin America*" OR Caribbean* OR Aruba* OR Curacao* OR "Sint Maarten*" OR "West Indies*" OR Montserrat* OR Turks* OR Caicos* OR Cayman* OR Antigua* OR Barbuda* OR Bahamas* OR Barbados* OR "British Virgin Island*" OR Cuba* OR Dominica* OR Grenada* OR Guadeloupe* OR Haiti* OR Jamaica* OR Martinique* OR "Puerto Rico*" OR "Puerto Rican*" OR "Saint Kitts*" OR "St Kitts*" OR Nevis* OR "Saint Lucia*" OR "St Lucia*" OR "Saint Vincent*" OR "St Vincent*" OR Grenadines* OR Trinidad* OR Tobago* OR "Virgin Island*" OR "Saint Bart*" OR "St Bart*" OR "Central America*" OR Belize* OR "Costa Rica*" OR "El Salvador*" OR Salvadorean* OR Salvadoran* OR Salvadorian* OR Guatemala* OR Honduras* OR Nicaragua* OR Panama* OR "South America*" OR Argentina* OR Argentine* OR Argentinian* OR Bolivia* OR Brazil* OR Brasil* OR Chile* OR Colombia* OR Ecuador* OR Guyana* OR Guiana* OR Paraguay* OR Peru* OR Suriname* OR Surinam* OR Uruguay* OR Venezuela* OR Mexico* OR Mexican* OR Hispanic* OR Hispano* OR Latin OR Latina* OR Latine* OR Latinu* OR Latino* OR Latinx* OR "Spanish speak*" OR "Spanish America*" OR Boricua* OR Chicana* OR Chicano*):ab,ti,kw |
| #6 | #1 AND (#2 OR #3 OR #4) AND #5 AND 2020 – present                                                                                                                                                                                                                                                                                                                                                                                                                                                                                                                                                                                                                                                                                                                                                                                                                                                                                                                                                                                                                                                                                                                                                                                                                              |
| #7 | 'health care policy'/exp OR ("health system recovery" OR "post-pandemic" OR "post-pandemic recovery" OR "post-COVID-19 recovery" OR "recovery plan*" OR "health strategy*" OR "reform" OR "disruption recovery"):ab,ti,kw                                                                                                                                                                                                                                                                                                                                                                                                                                                                                                                                                                                                                                                                                                                                                                                                                                                                                                                                                                                                                                                      |
| #8 | #1 AND (#2 OR #3 OR #4) AND #7 AND 2020 – present                                                                                                                                                                                                                                                                                                                                                                                                                                                                                                                                                                                                                                                                                                                                                                                                                                                                                                                                                                                                                                                                                                                                                                                                                              |
| #9 | #6 OR #7                                                                                                                                                                                                                                                                                                                                                                                                                                                                                                                                                                                                                                                                                                                                                                                                                                                                                                                                                                                                                                                                                                                                                                                                                                                                       |



**Table A5: Search terms in Cochrane, run 12<sup>th</sup> December 2022**

|     |                                                                                                                                                                                                                                                                                                                                                                                                                                                                                                                                                                                                                                                                                                               |
|-----|---------------------------------------------------------------------------------------------------------------------------------------------------------------------------------------------------------------------------------------------------------------------------------------------------------------------------------------------------------------------------------------------------------------------------------------------------------------------------------------------------------------------------------------------------------------------------------------------------------------------------------------------------------------------------------------------------------------|
| #1  | MeSH descriptor: [Coronavirus Infections] explode all trees                                                                                                                                                                                                                                                                                                                                                                                                                                                                                                                                                                                                                                                   |
| #2  | MeSH descriptor: [COVID-19] explode all trees                                                                                                                                                                                                                                                                                                                                                                                                                                                                                                                                                                                                                                                                 |
| #3  | MeSH descriptor: [SARS-CoV-2] explode all trees                                                                                                                                                                                                                                                                                                                                                                                                                                                                                                                                                                                                                                                               |
| #4  | MeSH descriptor: [Coronavirus] explode all trees                                                                                                                                                                                                                                                                                                                                                                                                                                                                                                                                                                                                                                                              |
| #5  | MeSH descriptor: [Betacoronavirus] explode all trees                                                                                                                                                                                                                                                                                                                                                                                                                                                                                                                                                                                                                                                          |
| #6  | MeSH descriptor: [COVID-19 Testing] explode all trees                                                                                                                                                                                                                                                                                                                                                                                                                                                                                                                                                                                                                                                         |
| #7  | MeSH descriptor: [COVID-19 Vaccines] explode all trees                                                                                                                                                                                                                                                                                                                                                                                                                                                                                                                                                                                                                                                        |
| #8  | ((("COVID-19" OR "COVID 19" OR "COVID19" OR "COVID2019" OR "COVID 2019" OR "COVID-2019" OR "novel coronavirus" OR "new coronavirus" OR "novel corona virus" OR "new corona virus" OR "SARS-CoV-2" OR "SARSCoV2" OR "SARS-CoV2" OR "2019nCoV" OR "2019-nCoV" OR "2019 coronavirus" OR "2019 corona virus" OR "coronavirus disease 2019" OR "corona virus disease 2019" OR "severe acute respiratory syndrome coronavirus 2" OR "sars-coronavirus-2" OR "SARS Coronavirus 2" OR "coronavirus disease 19" OR "corona virus disease 19") OR (coronavirus OR "corona virus" OR coronavirinae OR coronaviridae OR betacoronavirus OR nCoV OR "CoV 2" OR CoV2 OR sarscov2 OR "novel CoV" OR "wuhan virus")):ab,ti,kw |
| #9  | ((wuhan OR hubei OR huanan) AND ("severe acute respiratory" OR pneumonia) AND (outbreak)):ab,ti,kw                                                                                                                                                                                                                                                                                                                                                                                                                                                                                                                                                                                                            |
| #10 | {OR #1-#9}                                                                                                                                                                                                                                                                                                                                                                                                                                                                                                                                                                                                                                                                                                    |
| #11 | MeSH descriptor: [Primary Health Care] explode all trees                                                                                                                                                                                                                                                                                                                                                                                                                                                                                                                                                                                                                                                      |
| #12 | MeSH descriptor: [General Practice] explode all trees                                                                                                                                                                                                                                                                                                                                                                                                                                                                                                                                                                                                                                                         |
| #13 | MeSH descriptor: [General Practitioners] explode all trees                                                                                                                                                                                                                                                                                                                                                                                                                                                                                                                                                                                                                                                    |
| #14 | MeSH descriptor: [Health Services] explode all trees                                                                                                                                                                                                                                                                                                                                                                                                                                                                                                                                                                                                                                                          |
| #15 | MeSH descriptor: [Primary Health Care] explode all trees                                                                                                                                                                                                                                                                                                                                                                                                                                                                                                                                                                                                                                                      |
| #16 | MeSH descriptor: [Physicians, Primary Care] explode all trees                                                                                                                                                                                                                                                                                                                                                                                                                                                                                                                                                                                                                                                 |
| #17 | MeSH descriptor: [Ambulatory Care] explode all trees                                                                                                                                                                                                                                                                                                                                                                                                                                                                                                                                                                                                                                                          |
| #18 | MeSH descriptor: [Continuity of Patient Care] explode all trees                                                                                                                                                                                                                                                                                                                                                                                                                                                                                                                                                                                                                                               |
| #19 | MeSH descriptor: [Health Policy] explode all trees                                                                                                                                                                                                                                                                                                                                                                                                                                                                                                                                                                                                                                                            |
| #20 | MeSH descriptor: [Delivery of Health Care] explode all trees                                                                                                                                                                                                                                                                                                                                                                                                                                                                                                                                                                                                                                                  |
| #21 | ("first level of care" OR "primary care" OR "primary health care" OR "general practice" OR "general practitioner" OR "general practitioners" OR "health service" OR "health services" OR "ambulatory care" OR "continuity of patient care" OR "continuity of care" OR "healthcare system" OR "healthcare systems" OR "health care system" OR "health care systems" OR "health policy" OR "health policies" OR "healthcare policy" OR "healthcare policies"):ab,ti,kw                                                                                                                                                                                                                                          |
| #22 | {OR #11-#21}                                                                                                                                                                                                                                                                                                                                                                                                                                                                                                                                                                                                                                                                                                  |
| #23 | MeSH descriptor: [Disease Management] explode all trees                                                                                                                                                                                                                                                                                                                                                                                                                                                                                                                                                                                                                                                       |
| #24 | MeSH descriptor: [Self-Management] explode all trees                                                                                                                                                                                                                                                                                                                                                                                                                                                                                                                                                                                                                                                          |
| #25 | MeSH descriptor: [Self Care] explode all trees                                                                                                                                                                                                                                                                                                                                                                                                                                                                                                                                                                                                                                                                |
| #26 | ("disease management" OR (self NEXT manag*) OR "self-care" OR "care, self" OR (self NEXT treat*) OR (self NEXT test) OR (self NEXT medicat*) OR (self NEXT monitor*) OR (self NEXT diagnos*) OR "self-efficacy" OR (self NEXT competen*)):ab,ti,kw                                                                                                                                                                                                                                                                                                                                                                                                                                                            |
| #27 | {OR #23-#26}                                                                                                                                                                                                                                                                                                                                                                                                                                                                                                                                                                                                                                                                                                  |
| #28 | MeSH descriptor: [Quality of Health Care] explode all trees                                                                                                                                                                                                                                                                                                                                                                                                                                                                                                                                                                                                                                                   |
| #29 | MeSH descriptor: [Patient Acceptance of Health Care] explode all trees                                                                                                                                                                                                                                                                                                                                                                                                                                                                                                                                                                                                                                        |
| #30 | MeSH descriptor: [Patient Care Management] explode all trees                                                                                                                                                                                                                                                                                                                                                                                                                                                                                                                                                                                                                                                  |
| #31 | MeSH descriptor: [Universal Health Care] explode all trees                                                                                                                                                                                                                                                                                                                                                                                                                                                                                                                                                                                                                                                    |
| #32 | MeSH descriptor: [Facilities and Services Utilization] explode all trees                                                                                                                                                                                                                                                                                                                                                                                                                                                                                                                                                                                                                                      |
| #33 | MeSH descriptor: [Management Information Systems] explode all trees                                                                                                                                                                                                                                                                                                                                                                                                                                                                                                                                                                                                                                           |

|     |                                                                                                                                                                                                                                                                                                                                                                                                                                                                                                                                                                                                                                                                                                                               |
|-----|-------------------------------------------------------------------------------------------------------------------------------------------------------------------------------------------------------------------------------------------------------------------------------------------------------------------------------------------------------------------------------------------------------------------------------------------------------------------------------------------------------------------------------------------------------------------------------------------------------------------------------------------------------------------------------------------------------------------------------|
| #34 | ("Quality of Health Care" OR "healthcare quality" OR "health care quality" OR "Patient Acceptance of Health Care" OR "Patient Acceptance of Healthcare" OR "healthcare utilization" OR "health care utilization" OR "patient compliance" OR "Facilities Utilization" OR "Services Utilization" OR "Patient Care" OR "point of care" OR "Universal Health Care" OR "Universal Healthcare" OR "Information Systems"):ab,ti,kw                                                                                                                                                                                                                                                                                                   |
| #35 | {OR #28-#34}                                                                                                                                                                                                                                                                                                                                                                                                                                                                                                                                                                                                                                                                                                                  |
| #36 | MeSH descriptor: [Health Facilities] explode all trees                                                                                                                                                                                                                                                                                                                                                                                                                                                                                                                                                                                                                                                                        |
| #37 | MeSH descriptor: [Health Personnel] explode all trees                                                                                                                                                                                                                                                                                                                                                                                                                                                                                                                                                                                                                                                                         |
| #38 | MeSH descriptor: [Health Workforce] explode all trees                                                                                                                                                                                                                                                                                                                                                                                                                                                                                                                                                                                                                                                                         |
| #39 | MeSH descriptor: [Health Information Systems] explode all trees                                                                                                                                                                                                                                                                                                                                                                                                                                                                                                                                                                                                                                                               |
| #40 | MeSH descriptor: [Budgets] explode all trees                                                                                                                                                                                                                                                                                                                                                                                                                                                                                                                                                                                                                                                                                  |
| #41 | MeSH descriptor: [Financial Management, Hospital] explode all trees                                                                                                                                                                                                                                                                                                                                                                                                                                                                                                                                                                                                                                                           |
| #42 | ("health facility" OR "health facilities" OR "health personnel" OR "health care provider" OR "health care providers" OR "healthcare provider" OR "healthcare providers" OR "health care worker" OR "health care workers" OR "healthcare worker" OR "healthcare workers" OR "health care professional" OR "health care professionals" OR "healthcare professional" OR "healthcare professionals" OR "health workforce" OR nurse* OR pharmacist* OR physician* OR medication OR "drug supply" OR "drug supplies" OR "health facility" OR "health facilities" OR "medical facility" OR "medical facilities" OR "facility infrastructure" OR outpatient* OR budget* OR financial*):ab,ti,kw                                       |
| #43 | ("resilient health system" OR "resilient health systems" OR "sustainable health system" OR "sustainable health systems" OR "health system sustainability" OR "health system resilience" OR "resilient health systems" OR "patient centered care" OR "patient acceptance"):ab,ti,kw                                                                                                                                                                                                                                                                                                                                                                                                                                            |
| #44 | {OR #36-#43}                                                                                                                                                                                                                                                                                                                                                                                                                                                                                                                                                                                                                                                                                                                  |
| #45 | MeSH descriptor: [Glucose Metabolism Disorders] explode all trees                                                                                                                                                                                                                                                                                                                                                                                                                                                                                                                                                                                                                                                             |
| #46 | MeSH descriptor: [Glycogen Storage Disease] explode all trees                                                                                                                                                                                                                                                                                                                                                                                                                                                                                                                                                                                                                                                                 |
| #47 | MeSH descriptor: [Insulin Resistance] explode all trees                                                                                                                                                                                                                                                                                                                                                                                                                                                                                                                                                                                                                                                                       |
| #48 | MeSH descriptor: [Blood Glucose] explode all trees                                                                                                                                                                                                                                                                                                                                                                                                                                                                                                                                                                                                                                                                            |
| #49 | MeSH descriptor: [Glucose Tolerance Test] explode all trees                                                                                                                                                                                                                                                                                                                                                                                                                                                                                                                                                                                                                                                                   |
| #50 | (diabetes OR diabetic* OR "glucose intolerant" OR "glucose intolerance" OR "glucose tolerance" OR "blood glucose" OR "blood sugar" OR "blood sugars" OR "elevated serum glucose level" OR "elevated serum glucose levels" OR hyperglycemia* OR hyperglucemia* OR hyperglycaemia* OR IDDM OR MODY OR NIDDM OR T1DM OR T2DM OR prediabet* OR IIDM OR "glycogen storage disease" OR "glycogen storage diseases" OR glycogenoses OR glycogenesis OR "glycosylation disorder" OR "glycosylation disorders" OR "insulin coma" OR "insulin comas" OR "insulin resistance" OR "insulin resistant" OR "insulin sensitivity" OR "insulin sensitivities" OR "insulin shock" OR "insulin independent" OR "insulin independence"):ab,ti,kw |
| #51 | {OR #45-#50}                                                                                                                                                                                                                                                                                                                                                                                                                                                                                                                                                                                                                                                                                                                  |
| #52 | MeSH descriptor: [Hypertension] explode all trees                                                                                                                                                                                                                                                                                                                                                                                                                                                                                                                                                                                                                                                                             |
| #53 | MeSH descriptor: [Prehypertension] explode all trees                                                                                                                                                                                                                                                                                                                                                                                                                                                                                                                                                                                                                                                                          |
| #54 | MeSH descriptor: [Blood Pressure] explode all trees                                                                                                                                                                                                                                                                                                                                                                                                                                                                                                                                                                                                                                                                           |
| #55 | MeSH descriptor: [Noncommunicable Diseases] explode all trees                                                                                                                                                                                                                                                                                                                                                                                                                                                                                                                                                                                                                                                                 |
| #56 | MeSH descriptor: [Antihypertensive Agents] explode all trees                                                                                                                                                                                                                                                                                                                                                                                                                                                                                                                                                                                                                                                                  |
| #57 | (hypertension* OR "hyper tension" OR hypertensive* OR "blood pressure" OR "blood pressures" OR prehypertens* OR systolic OR systole OR diastolic OR diastole OR "pulse pressure" OR "pulse pressures" OR "Noncommunicable Diseases" OR "Non communicable Diseases" OR Antihypertensive*):ab,ti,kw                                                                                                                                                                                                                                                                                                                                                                                                                             |
| #58 | {OR #52-#57}                                                                                                                                                                                                                                                                                                                                                                                                                                                                                                                                                                                                                                                                                                                  |
| #59 | ( #22 OR #27 OR #35 OR #44 OR #51 OR #58)                                                                                                                                                                                                                                                                                                                                                                                                                                                                                                                                                                                                                                                                                     |
| #60 | MeSH descriptor: [Latin America] explode all trees                                                                                                                                                                                                                                                                                                                                                                                                                                                                                                                                                                                                                                                                            |

|     |                                                                                                                                                                                                                                                                                                                                                                                                                                                                                                                                                                                                                                                                                                                                                                                                                                                                                                                                                                                                                                                                                                                                                                                                                                                                                            |
|-----|--------------------------------------------------------------------------------------------------------------------------------------------------------------------------------------------------------------------------------------------------------------------------------------------------------------------------------------------------------------------------------------------------------------------------------------------------------------------------------------------------------------------------------------------------------------------------------------------------------------------------------------------------------------------------------------------------------------------------------------------------------------------------------------------------------------------------------------------------------------------------------------------------------------------------------------------------------------------------------------------------------------------------------------------------------------------------------------------------------------------------------------------------------------------------------------------------------------------------------------------------------------------------------------------|
| #61 | MeSH descriptor: [Caribbean Region] explode all trees                                                                                                                                                                                                                                                                                                                                                                                                                                                                                                                                                                                                                                                                                                                                                                                                                                                                                                                                                                                                                                                                                                                                                                                                                                      |
| #62 | MeSH descriptor: [South America] explode all trees                                                                                                                                                                                                                                                                                                                                                                                                                                                                                                                                                                                                                                                                                                                                                                                                                                                                                                                                                                                                                                                                                                                                                                                                                                         |
| #63 | MeSH descriptor: [Mexico] explode all trees                                                                                                                                                                                                                                                                                                                                                                                                                                                                                                                                                                                                                                                                                                                                                                                                                                                                                                                                                                                                                                                                                                                                                                                                                                                |
| #64 | MeSH descriptor: [Mexican Americans] explode all trees                                                                                                                                                                                                                                                                                                                                                                                                                                                                                                                                                                                                                                                                                                                                                                                                                                                                                                                                                                                                                                                                                                                                                                                                                                     |
| #65 | MeSH descriptor: [Hispanic or Latino] explode all trees                                                                                                                                                                                                                                                                                                                                                                                                                                                                                                                                                                                                                                                                                                                                                                                                                                                                                                                                                                                                                                                                                                                                                                                                                                    |
| #66 | ((Latin NEXT America*) OR Caribbean* OR Aruba* OR Curacao* OR (Sint NEXT Maarten*) OR (West NEXT Indies*) OR Montserrat* OR Turks* OR Caicos* OR Cayman* OR Antigua* OR Barbuda* OR Bahamas* OR Barbados* OR ("British Virgin" NEXT Island*) OR Cuba* OR Dominica* OR Grenada* OR Guadeloupe* OR Haiti* OR Jamaica* OR Martinique* OR (Puerto NEXT Rico*) OR (Puerto NEXT Rican*) OR (Saint NEXT Kitts*) OR (St NEXT Kitts*) OR Nevis* OR (Saint NEXT Lucia*) OR (St NEXT Lucia*) OR (Saint NEXT Vincent*) OR (St NEXT Vincent*) OR Grenadines* OR Trinidad* OR Tobago* OR (Virgin NEXT Island*) OR (Saint NEXT Bart*) OR (St NEXT Bart*) OR (Central NEXT America*) OR Belize* OR (Costa NEXT Rica*) OR (El NEXT Salvador*) OR Salvadorean* OR Salvadoran* OR Salvadorian* OR Guatemala* OR Honduras* OR Nicaragua* OR Panama* OR (South NEXT America*) OR Argentina* OR Argentine* OR Argentinian* OR Bolivia* OR Brazil* OR Brasil* OR Chile* OR Colombia* OR Ecuador* OR Guyana* OR Guiana* OR Paraguay* OR Peru* OR Suriname* OR Surinam* OR Uruguay* OR Venezuela* OR Mexico* OR Mexican* OR Hispanic* OR Hispano* OR Latin OR Latina* OR Latine* OR Latinu* OR Latino* OR Latinx* OR (Spanish NEXT speak*) OR (Spanish NEXT America*) OR Boricua* OR Chicana* OR Chicano*):ab,ti,kw |
| #67 | {OR #60-#66}                                                                                                                                                                                                                                                                                                                                                                                                                                                                                                                                                                                                                                                                                                                                                                                                                                                                                                                                                                                                                                                                                                                                                                                                                                                                               |
| #68 | #10 AND #59 AND #67 with Cochrane Library publication date Between Jan 2020 and Dec 2022                                                                                                                                                                                                                                                                                                                                                                                                                                                                                                                                                                                                                                                                                                                                                                                                                                                                                                                                                                                                                                                                                                                                                                                                   |
| #69 | MeSH descriptor: [Health Care Reform] explode all trees                                                                                                                                                                                                                                                                                                                                                                                                                                                                                                                                                                                                                                                                                                                                                                                                                                                                                                                                                                                                                                                                                                                                                                                                                                    |
| #70 | ("health system recovery" OR "post-pandemic" OR "post-pandemic recovery" OR "post-COVID-19 recovery" OR "recovery plan*" OR "health strategy*" OR "reform" OR "disruption recovery"):ab,ti,kw                                                                                                                                                                                                                                                                                                                                                                                                                                                                                                                                                                                                                                                                                                                                                                                                                                                                                                                                                                                                                                                                                              |
| #71 | #69 OR #70                                                                                                                                                                                                                                                                                                                                                                                                                                                                                                                                                                                                                                                                                                                                                                                                                                                                                                                                                                                                                                                                                                                                                                                                                                                                                 |
| #72 | #10 AND #59 AND #71 with Cochrane Library publication date Between Jan 2020 and Dec 2022                                                                                                                                                                                                                                                                                                                                                                                                                                                                                                                                                                                                                                                                                                                                                                                                                                                                                                                                                                                                                                                                                                                                                                                                   |
| #73 | #68 OR #72                                                                                                                                                                                                                                                                                                                                                                                                                                                                                                                                                                                                                                                                                                                                                                                                                                                                                                                                                                                                                                                                                                                                                                                                                                                                                 |

**Table A6: Search terms in CINAHL, run 12<sup>th</sup> December 2022**

|    |                                                                                                                                                                                                                                                                                                                                                                                                                                                                                                                                                                                                                                                                                                                                                                                                                                                                       |
|----|-----------------------------------------------------------------------------------------------------------------------------------------------------------------------------------------------------------------------------------------------------------------------------------------------------------------------------------------------------------------------------------------------------------------------------------------------------------------------------------------------------------------------------------------------------------------------------------------------------------------------------------------------------------------------------------------------------------------------------------------------------------------------------------------------------------------------------------------------------------------------|
| S1 | (MH "Coronavirus Infections+") OR (MH "COVID-19") OR (MH "Coronavirus+")<br>OR<br>(COVID-19 OR "COVID 19" OR "COVID19" OR "COVID2019" OR "COVID 2019" OR COVID-2019 OR "novel coronavirus" OR "new coronavirus" OR "novel corona virus" OR "new corona virus" OR SARS-CoV-2 OR "SARSCoV2" OR SARS-CoV2 OR "2019nCoV" OR 2019-nCoV OR "2019 coronavirus" OR "2019 corona virus" OR "coronavirus disease 2019" OR "corona virus disease 2019" OR "severe acute respiratory syndrome coronavirus 2" OR sars-coronavirus-2 OR "SARS Coronavirus 2" OR "coronavirus disease 19" OR "corona virus disease 19") OR (coronavirus OR "corona virus" OR coronavirinae OR coronaviridae OR betacoronavirus OR nCoV OR "CoV 2" OR CoV2 OR sarscov2 OR "novel CoV" OR "wuhan virus") OR ((wuhan OR hubei OR huanan) AND ("severe acute respiratory" OR pneumonia) AND (outbreak*)) |
| S2 | (MH "Primary Health Care") OR (MH "Family Practice") OR (MH "Physicians, Family") OR (MH "Health Services+") OR (MH "Ambulatory Care") OR (MH "Continuity of Patient Care+") OR (MH "Health Policy+") OR (MH "Health Care Delivery+") OR ("first level of care" OR "primary care" OR "primary health care" OR "general practice" OR "general practitioner*" OR "health service*" OR "ambulatory care" OR "continuity of patient care" OR "continuity of care" OR                                                                                                                                                                                                                                                                                                                                                                                                      |

|    |                                                                                                                                                                                                                                                                                                                                                                                                                                                                                                                                                                                                                                                                                                                                                                                                                                                                                                                                                                                                                                                                                                                                                                                                                                                                                                                                                                                                                                                                                                                                                                                                                                                                                                                                                                                                                                                                                                                                                                                                                                                                                                |
|----|------------------------------------------------------------------------------------------------------------------------------------------------------------------------------------------------------------------------------------------------------------------------------------------------------------------------------------------------------------------------------------------------------------------------------------------------------------------------------------------------------------------------------------------------------------------------------------------------------------------------------------------------------------------------------------------------------------------------------------------------------------------------------------------------------------------------------------------------------------------------------------------------------------------------------------------------------------------------------------------------------------------------------------------------------------------------------------------------------------------------------------------------------------------------------------------------------------------------------------------------------------------------------------------------------------------------------------------------------------------------------------------------------------------------------------------------------------------------------------------------------------------------------------------------------------------------------------------------------------------------------------------------------------------------------------------------------------------------------------------------------------------------------------------------------------------------------------------------------------------------------------------------------------------------------------------------------------------------------------------------------------------------------------------------------------------------------------------------|
|    | <p>"healthcare system*" OR "health care system*" OR "health policy" OR "health policies" OR "healthcare policy" OR "healthcare policies")</p> <p>OR</p> <p>(MH "Disease Management+") OR (MH "Self-Management") OR (MH "Self Care+") OR ("disease management" OR "self-manag*" OR "self-care" OR "care, self" OR "self-treat*" OR "self-test*" OR "self-medicat*" OR "self-monitor*" OR "self-diagnos*" OR "self-efficacy" OR "self-competen*")</p> <p>OR</p> <p>(MH "Quality of Health Care+") OR (MH "Patient Attitudes") OR (MH "Patient Care Plans+") OR (MH "Patient Centered Care") OR (MH "Universal Health Care") OR (MH "Managed Care Information Systems+") OR (MH "Facilities, Manpower and Services+") OR (MH "Management Information Systems+") OR (MH "Patient Compliance+") OR ("quality of health care" OR "healthcare quality" OR "health care quality" OR "patient acceptance of health care" OR "patient acceptance of healthcare" OR "healthcare utilization" OR "health care utilization" OR "patient compliance" OR "facilities utilization" OR "services utilization" OR "patient care" OR "point of care" OR "universal health care" OR "universal healthcare" OR "information systems")</p> <p>OR</p> <p>(MH "Health Facilities+") OR (MH "Health Personnel+") OR (MH "Workforce") OR (MH "Health Information Systems+") OR (MH "Budgets") OR (MH "Financial Management+") OR ("health facility" OR "health facilities" OR "health personnel" OR "health care provider*" OR "healthcare provider*" OR "health care worker*" OR "healthcare worker*" OR "health care professional*" OR "healthcare professional*" OR "health workforce" OR nurse* OR pharmacist* OR physician* OR medication OR "drug supply" OR "drug supplies" OR "health facilit*" OR "medical facilit*" OR "facility infrastructure" OR outpatient* OR budget* OR financial*) OR ("resilient health system*" OR "sustainable health system*" OR "health system sustainability" OR "health system resilience" OR "resilient health systems" OR "patient centered care" OR "patient acceptance")</p> |
| S3 | <p>(MH "Glucose Metabolism Disorders+") OR (MH "Glycogen Storage Disease") OR (MH "Insulin Resistance+") OR (MH "Blood Glucose") OR (MH "Glucose Tolerance Test") OR (diabetes OR diabetic* OR "glucose intoler*" OR "glucose toler*" OR "blood glucose" OR "blood sugar*" OR "elevated serum glucose level*" OR hyperglycemia* OR hyperglucemia* OR hyperglycaemia* OR IDDM OR MODY OR NIDDM OR T1DM OR T2DM OR prediabet* OR IIDM OR "glycogen storage disease*" OR glycogenoses OR glycogenesis OR "glycosylation disorder*" OR "insulin coma*" OR "insulin resistanc*" OR "insulin sensitivit*" OR "insulin shock*" OR "insulin independ*")</p>                                                                                                                                                                                                                                                                                                                                                                                                                                                                                                                                                                                                                                                                                                                                                                                                                                                                                                                                                                                                                                                                                                                                                                                                                                                                                                                                                                                                                                            |
| S4 | <p>(MH "Hypertension+") OR (MH "Prehypertension") OR (MH "Blood Pressure+") OR (MH "Noncommunicable Diseases") OR (MH "Antihypertensive Agents+") OR ("hypertension*" OR "hyper tension*" OR hypertensive* OR "blood pressure*" OR prehypertens* OR systolic OR systole OR diastolic OR diastole OR "pulse pressure*" OR "Noncommunicable Diseases" OR "Non communicable Diseases" OR "Antihypertensive*")</p>                                                                                                                                                                                                                                                                                                                                                                                                                                                                                                                                                                                                                                                                                                                                                                                                                                                                                                                                                                                                                                                                                                                                                                                                                                                                                                                                                                                                                                                                                                                                                                                                                                                                                 |
| S5 | <p>(MH "Latin America") OR (MH "South America+") OR (MH "West Indies+") OR (MH "Central America+") OR (MH "Mexican Americans") OR (MH "Hispanic Americans+") OR ("Latin America*" OR Caribbean* OR Aruba* OR Curacao* OR "Sint Maarten*" OR "West Indies*" OR Montserrat* OR Turks* OR Caicos* OR Cayman* OR Antigua* OR Barbuda* OR Bahamas* OR Barbados* OR "British Virgin Island*" OR Cuba* OR Dominica* OR Grenada* OR Guadeloupe* OR Haiti* OR Jamaica* OR Martinique* OR "Puerto Rico*" OR "Puerto</p>                                                                                                                                                                                                                                                                                                                                                                                                                                                                                                                                                                                                                                                                                                                                                                                                                                                                                                                                                                                                                                                                                                                                                                                                                                                                                                                                                                                                                                                                                                                                                                                  |

|    |                                                                                                                                                                                                                                                                                                                                                                                                                                                                                                                                                                                                                                                                                                                                                                                                                              |
|----|------------------------------------------------------------------------------------------------------------------------------------------------------------------------------------------------------------------------------------------------------------------------------------------------------------------------------------------------------------------------------------------------------------------------------------------------------------------------------------------------------------------------------------------------------------------------------------------------------------------------------------------------------------------------------------------------------------------------------------------------------------------------------------------------------------------------------|
|    | Rican*" OR "Saint Kitts*" OR "St Kitts*" OR Nevis* OR "Saint Lucia*" OR "St Lucia*" OR "Saint Vincent*" OR "St Vincent*" OR Grenadines* OR Trinidad* OR Tobago* OR "Virgin Island*" OR "Saint Bart*" OR "St Bart*" OR "Central America*" OR Belize* OR "Costa Rica*" OR "El Salvador*" OR Salvadorean* OR Salvadoran* OR Salvadorian* OR Guatemala* OR Honduras* OR Nicaragua* OR Panama* OR "South America*" OR Argentina* OR Argentine* OR Argentinian* OR Bolivia* OR Brazil* OR Brasil* OR Chile* OR Colombia* OR Ecuador* OR Guyana* OR Guiana* OR Paraguay* OR Peru* OR Suriname* OR Surinam* OR Uruguay* OR Venezuela* OR Mexico* OR Mexican* OR Hispanic* OR Hispano* OR Latin OR Latina* OR Latine* OR Latinu* OR Latino* OR Latinx* OR "Spanish speak*" OR "Spanish America*" OR Boricua* OR Chicana* OR Chicano*) |
| S6 | S1 AND (S2 OR S3 OR S4) AND S5 AND 2020 – present                                                                                                                                                                                                                                                                                                                                                                                                                                                                                                                                                                                                                                                                                                                                                                            |
| S7 | (MH "Health Care Reform+") OR "health system recovery" OR "post-pandemic" OR "post-pandemic recovery" OR "post-COVID-19 recovery" OR "recovery plan*" OR "health strategy*" OR "reform" OR "disruption recovery"                                                                                                                                                                                                                                                                                                                                                                                                                                                                                                                                                                                                             |
| S8 | S1 AND (S2 OR S3 OR S4) AND S7 AND 2020 – present                                                                                                                                                                                                                                                                                                                                                                                                                                                                                                                                                                                                                                                                                                                                                                            |
| S9 | S6 OR S8                                                                                                                                                                                                                                                                                                                                                                                                                                                                                                                                                                                                                                                                                                                                                                                                                     |

**Table A7: Search terms in Global Health, run 12<sup>th</sup> December 2022**

|   |                                                                                                                                                                                                                                                                                                                                                                                                                                                                                                                                                                                                                                                                                                                                                                                                                                                                                                                                                                                                                                                                                                                                                                                                                                                      |
|---|------------------------------------------------------------------------------------------------------------------------------------------------------------------------------------------------------------------------------------------------------------------------------------------------------------------------------------------------------------------------------------------------------------------------------------------------------------------------------------------------------------------------------------------------------------------------------------------------------------------------------------------------------------------------------------------------------------------------------------------------------------------------------------------------------------------------------------------------------------------------------------------------------------------------------------------------------------------------------------------------------------------------------------------------------------------------------------------------------------------------------------------------------------------------------------------------------------------------------------------------------|
| 1 | (exp betacoronavirus/ or exp coronavirinae/) OR ("COVID-19" OR "COVID 19" OR "COVID19" OR "COVID2019" OR "COVID 2019" OR "COVID-2019" OR "novel coronavirus" OR "new coronavirus" OR "novel corona virus" OR "new corona virus" OR "SARS-CoV-2" OR "SARSCoV2" OR "SARS-CoV2" OR "2019nCoV" OR "2019-nCoV" OR "2019 coronavirus" OR "2019 corona virus" OR "coronavirus disease 2019" OR "corona virus disease 2019" OR "severe acute respiratory syndrome coronavirus 2" OR "sars-coronavirus-2" OR "SARS Coronavirus 2" OR "coronavirus disease 19" OR "corona virus disease 19").mp. OR (coronavirus OR "corona virus" OR coronavirinae OR coronaviridae OR betacoronavirus OR nCoV OR "CoV 2" OR CoV2 OR sarscov2 OR "novel CoV" OR "wuhan virus").mp. OR ((wuhan OR hubei OR huanan) AND ("severe acute respiratory" OR pneumonia) AND (outbreak*)).mp.                                                                                                                                                                                                                                                                                                                                                                                          |
| 2 | exp primary health care/ OR exp general practitioners/ OR exp health services/ OR exp health policy/ OR exp health care/ OR ("first level of care" OR "primary care" OR "primary health care" OR "general practice" OR "general practitioner*" OR "health service*" OR "ambulatory care" OR "continuity of patient care" OR "continuity of care" OR "healthcare system*" OR "health care system*" OR "health policy" OR "health policies" OR "healthcare policy" OR "healthcare policies").mp.<br><br>OR<br><br>exp self management/ OR exp self care/ OR ("disease management" OR "self-manag*" OR "self-care" OR "care, self" OR "self-treat*" OR "self-test*" OR "self-medicat*" OR "self-monitor*" OR "self-diagnos*" OR "self-efficacy" OR "self-competen*").mp.<br><br>OR<br><br>"quality of care".sh. OR exp attitudes to health/ OR exp patient care/ OR exp universal health coverage/ OR exp utilization/ OR information systems.sh. OR exp patient compliance/ OR ("Quality of Health Care" OR "healthcare quality" OR "health care quality" OR "Patient Acceptance of Health Care" OR "Patient Acceptance of Healthcare" OR "healthcare utilization" OR "health care utilization" OR "patient compliance" OR "Facilities Utilization" OR |

|   |                                                                                                                                                                                                                                                                                                                                                                                                                                                                                                                                                                                                                                                                                                                                                                                                                                                                                                                                                                                                                                                                                                                                                                                                                                                                                                                   |
|---|-------------------------------------------------------------------------------------------------------------------------------------------------------------------------------------------------------------------------------------------------------------------------------------------------------------------------------------------------------------------------------------------------------------------------------------------------------------------------------------------------------------------------------------------------------------------------------------------------------------------------------------------------------------------------------------------------------------------------------------------------------------------------------------------------------------------------------------------------------------------------------------------------------------------------------------------------------------------------------------------------------------------------------------------------------------------------------------------------------------------------------------------------------------------------------------------------------------------------------------------------------------------------------------------------------------------|
|   | <p>"Services Utilization" OR "Patient Care" OR "point of care" OR "Universal Health Care" OR "Universal Healthcare" OR "Information Systems").mp.</p> <p>OR</p> <p>exp health facilities/ OR exp personnel/ OR exp health care workers/ OR exp budgets/ OR ("health facility" OR "health facilities" OR "health personnel" OR "health care provider*" OR "healthcare provider*" OR "health care worker*" OR "healthcare worker*" OR "health care professional*" OR "healthcare professional*" OR "health workforce" OR nurse* OR pharmacist* OR physician* OR medication OR "drug supply" OR "drug supplies" OR health facilit* OR medical facilit* OR "facility infrastructure" OR outpatient* OR budget* OR financial*).mp.</p> <p>OR</p> <p>("resilient health system*" OR "sustainable health system*" OR "health system sustainability" OR "health system resilience" OR "resilient health systems" OR "patient centered care" OR "patient acceptance").mp.</p>                                                                                                                                                                                                                                                                                                                                              |
| 3 | <p>exp glucose tolerance/ OR exp glucose tolerance test/ OR exp diabetes/ OR exp blood sugar/ OR exp insulin resistance/ OR exp glycogenesis/ OR (diabetes OR diabetic* OR "glucose intoler*" OR "glucose toler*" OR "blood glucose" OR "blood sugar*" OR "elevated serum glucose level*" OR hyperglycemia* OR hyperglucemia* OR hyperglycaemia* OR IDDM OR MODY OR NIDDM OR T1DM OR T2DM OR prediabet* OR IIDM OR "glycogen storage disease*" OR glycogenoses OR glycogenesis OR "glycosylation disorder*" OR "insulin coma*" OR "insulin resist*" OR "insulin sensitivit*" OR "insulin shock*" OR "insulin independ*").mp.</p>                                                                                                                                                                                                                                                                                                                                                                                                                                                                                                                                                                                                                                                                                  |
| 4 | <p>exp hypertension/ OR exp blood pressure/ OR exp noncommunicable diseases/ OR exp antihypertensive agents/ OR ("hypertension*" OR "hyper tension*" OR hypertensive* OR "blood pressure*" OR prehypertens* OR systolic OR systole OR diastolic OR diastole OR "pulse pressure*" OR "Noncommunicable Diseases" OR "Non communicable Diseases" OR "Antihypertensive*").mp.</p>                                                                                                                                                                                                                                                                                                                                                                                                                                                                                                                                                                                                                                                                                                                                                                                                                                                                                                                                     |
| 5 | <p>exp Latin America/ OR exp South America/ OR exp Caribbean/ OR exp Central America/ OR Mexican-Americans.sh. OR Hispanics.sh. OR ("Latin America*" OR Caribbean* OR Aruba* OR Curacao* OR "Sint Maarten*" OR "West Indies*" OR Montserrat* OR Turks* OR Caicos* OR Cayman* OR Antigua* OR Barbuda* OR Bahamas* OR Barbados* OR "British Virgin Island*" OR Cuba* OR Dominica* OR Grenada* OR Guadeloupe* OR Haiti* OR Jamaica* OR Martinique* OR "Puerto Rico*" OR "Puerto Rican*" OR "Saint Kitts*" OR "St Kitts*" OR Nevis* OR "Saint Lucia*" OR "St Lucia*" OR "Saint Vincent*" OR "St Vincent*" OR Grenadines* OR Trinidad* OR Tobago* OR "Virgin Island*" OR "Saint Bart*" OR "St Bart*" OR "Central America*" OR Belize* OR "Costa Rica*" OR "El Salvador*" OR Salvadorean* OR Salvadoran* OR Salvadorian* OR Guatemala* OR Honduras* OR Nicaragua* OR Panama* OR "South America*" OR Argentina* OR Argentine* OR Argentinian* OR Bolivia* OR Brazil* OR Brasil* OR Chile* OR Colombia* OR Ecuador* OR Guyana* OR Guiana* OR Paraguay* OR Peru* OR Suriname* OR Surinam* OR Uruguay* OR Venezuela* OR Mexico* OR Mexican* OR Hispanic* OR Hispano* OR Latin OR Latina* OR Latine* OR Latinu* OR Latino* OR Latinx* OR "Spanish speak*" OR "Spanish America*" OR Boricua* OR Chicana* OR Chicano*).mp.</p> |
| 6 | #1 AND (#2 OR #3 OR #4) AND #5 AND 2020 – present                                                                                                                                                                                                                                                                                                                                                                                                                                                                                                                                                                                                                                                                                                                                                                                                                                                                                                                                                                                                                                                                                                                                                                                                                                                                 |
| 7 | <p>exp health policy/ OR ("health system recovery" OR "post-pandemic" OR "post-pandemic recovery" OR "post-COVID-19 recovery" OR "recovery plan*" OR "health strategy*" OR "reform" OR "disruption recovery").mp.</p>                                                                                                                                                                                                                                                                                                                                                                                                                                                                                                                                                                                                                                                                                                                                                                                                                                                                                                                                                                                                                                                                                             |
| 8 | #1 AND (#2 OR #3 OR #4) AND #7 AND 2020 – present                                                                                                                                                                                                                                                                                                                                                                                                                                                                                                                                                                                                                                                                                                                                                                                                                                                                                                                                                                                                                                                                                                                                                                                                                                                                 |
| 9 | #6 OR #8                                                                                                                                                                                                                                                                                                                                                                                                                                                                                                                                                                                                                                                                                                                                                                                                                                                                                                                                                                                                                                                                                                                                                                                                                                                                                                          |



**Table A8: Search terms in Web of Science, run 12<sup>th</sup> December 2022**

|    |                                                                                                                                                                                                                                                                                                                                                                                                                                                                                                                                                                                                                                                                                                                                                                                                                                                                                                                                                                                                                                                                                                                                                                                                                                                                                                                                                                                                                                                                                                                                                                                                                                                                                                                                                                      |
|----|----------------------------------------------------------------------------------------------------------------------------------------------------------------------------------------------------------------------------------------------------------------------------------------------------------------------------------------------------------------------------------------------------------------------------------------------------------------------------------------------------------------------------------------------------------------------------------------------------------------------------------------------------------------------------------------------------------------------------------------------------------------------------------------------------------------------------------------------------------------------------------------------------------------------------------------------------------------------------------------------------------------------------------------------------------------------------------------------------------------------------------------------------------------------------------------------------------------------------------------------------------------------------------------------------------------------------------------------------------------------------------------------------------------------------------------------------------------------------------------------------------------------------------------------------------------------------------------------------------------------------------------------------------------------------------------------------------------------------------------------------------------------|
| #1 | TS=(coronavir* OR "corona virus" OR betacoronavir* OR covid19 OR "covid-19" OR "covid 19" OR COVID2019 OR "COVID 2019" OR "COVID-19" OR nCoV OR "CoV 2" OR CoV2 OR sarscov2 OR 2019nCoV OR "novel CoV" OR "wuhan virus") OR (TS=(wuhan OR hubei OR huanan) AND TS=("severe acute respiratory" OR pneumonia*) AND TS=(outbreak*))                                                                                                                                                                                                                                                                                                                                                                                                                                                                                                                                                                                                                                                                                                                                                                                                                                                                                                                                                                                                                                                                                                                                                                                                                                                                                                                                                                                                                                     |
| #2 | <p>TS=("first level of care" OR "primary care" OR "primary health care" OR "general practice" OR "general practitioner*" OR "health service*" OR "ambulatory care" OR "continuity of patient care" OR "continuity of care" OR "healthcare system*" OR "health care system*" OR "health policy" OR "health policies" OR "healthcare policy" OR "healthcare policies")</p> <p>OR</p> <p>TS=("disease management" OR "self-manag*" OR "self-care" OR "care, self" OR "self-treat*" OR "self-test*" OR "self-medicat*" OR "self-monitor*" OR "self-diagnos*" OR "self-efficacy" OR "self-competen*")</p> <p>OR</p> <p>TS=("quality of health care" OR "healthcare quality" OR "health care quality" OR "patient acceptance of health care" OR "patient acceptance of healthcare" OR "healthcare utilization" OR "health care utilization" OR "patient compliance" OR "facilities utilization" OR "services utilization" OR "patient care" OR "point of care" OR "universal health care" OR "universal healthcare" OR "information systems")</p> <p>OR</p> <p>TS=("health facility" OR "health facilities" OR "health personnel" OR "health care provider*" OR "healthcare provider*" OR "health care worker*" OR "healthcare worker*" OR "health care professional*" OR "healthcare professional*" OR "health workforce" OR nurse* OR pharmacist* OR physician* OR medication OR "drug supply" OR "drug supplies" OR "health facilit*" OR "medical facilit*" OR "facility infrastructure" OR outpatient* OR budget* OR financial*)</p> <p>OR</p> <p>TS=("resilient health system*" OR "sustainable health system*" OR "health system sustainability" OR "health system resilience" OR "resilient health systems" OR "patient centered care" OR "patient acceptance")</p> |
| #3 | TS=(diabetes OR diabetic* OR "glucose intoler*" OR "glucose toler*" OR "blood glucose" OR "blood sugar*" OR "elevated serum glucose level*" OR hyperglycemia* OR hyperglucemia* OR hyperglycaemia* OR IDDM OR MODY OR NIDDM OR T1DM OR T2DM OR prediabet* OR IIDM OR "glycogen storage disease*" OR glycogenoses OR glycogenesis OR "glycosylation disorder*" OR "insulin coma*" OR "insulin resistan*" OR "insulin sensitivit*" OR "insulin shock*" OR "insulin independ*")                                                                                                                                                                                                                                                                                                                                                                                                                                                                                                                                                                                                                                                                                                                                                                                                                                                                                                                                                                                                                                                                                                                                                                                                                                                                                         |
| #4 | TS=("hypertension*" OR "hyper tension*" OR hypertensive* OR "blood pressure*" OR prehypertens* OR systolic OR systole OR diastolic OR diastole OR "pulse pressure*" OR "noncommunicable diseases" OR "non communicable diseases" OR "antihypertensive*")                                                                                                                                                                                                                                                                                                                                                                                                                                                                                                                                                                                                                                                                                                                                                                                                                                                                                                                                                                                                                                                                                                                                                                                                                                                                                                                                                                                                                                                                                                             |

|    |                                                                                                                                                                                                                                                                                                                                                                                                                                                                                                                                                                                                                                                                                                                                                                                                                                                                                                                                                                                                                                                                                                                                                                          |
|----|--------------------------------------------------------------------------------------------------------------------------------------------------------------------------------------------------------------------------------------------------------------------------------------------------------------------------------------------------------------------------------------------------------------------------------------------------------------------------------------------------------------------------------------------------------------------------------------------------------------------------------------------------------------------------------------------------------------------------------------------------------------------------------------------------------------------------------------------------------------------------------------------------------------------------------------------------------------------------------------------------------------------------------------------------------------------------------------------------------------------------------------------------------------------------|
| #5 | TS=("Latin America*" OR Caribbean* OR Aruba* OR Curacao* OR "Sint Maarten*" OR "West Indies*" OR Montserrat* OR Turks* OR Caicos* OR Cayman* OR Antigua* OR Barbuda* OR Bahamas* OR Barbados* OR "British Virgin Island*" OR Cuba* OR Dominica* OR Grenada* OR Guadeloupe* OR Haiti* OR Jamaica* OR Martinique* OR "Puerto Rico*" OR "Puerto Rican*" OR "Saint Kitts*" OR "St Kitts*" OR Nevis* OR "Saint Lucia*" OR "St Lucia*" OR "Saint Vincent*" OR "St Vincent*" OR Grenadines* OR Trinidad* OR Tobago* OR "Virgin Island*" OR "Saint Bart*" OR "St Bart*" OR "Central America*" OR Belize* OR "Costa Rica*" OR "El Salvador*" OR Salvadorean* OR Salvadoran* OR Salvadorian* OR Guatemala* OR Honduras* OR Nicaragua* OR Panama* OR "South America*" OR Argentina* OR Argentine* OR Argentinian* OR Bolivia* OR Brazil* OR Brasil* OR Chile* OR Colombia* OR Ecuador* OR Guyana* OR Guiana* OR Paraguay* OR Peru* OR Suriname* OR Surinam* OR Uruguay* OR Venezuela* OR Mexico* OR Mexican* OR Hispanic* OR Hispano* OR Latin OR Latina* OR Latine* OR Latinu* OR Latino* OR Latin* OR "Spanish speak*" OR "Spanish America*" OR Boricua* OR Chicana* OR Chicano*) |
| #6 | #1 AND (#2 OR #3 OR #4) AND #5 AND 2020 – present                                                                                                                                                                                                                                                                                                                                                                                                                                                                                                                                                                                                                                                                                                                                                                                                                                                                                                                                                                                                                                                                                                                        |
| #7 | TS=("health system recovery" OR "post-pandemic" OR "post-pandemic recovery" OR "post-COVID-19 recovery" OR "recovery plan*" OR "health strategy*" OR "reform" OR "disruption recovery")                                                                                                                                                                                                                                                                                                                                                                                                                                                                                                                                                                                                                                                                                                                                                                                                                                                                                                                                                                                  |
| #8 | #1 AND (#2 OR #3 OR #4) AND #7 AND 2020 – present                                                                                                                                                                                                                                                                                                                                                                                                                                                                                                                                                                                                                                                                                                                                                                                                                                                                                                                                                                                                                                                                                                                        |
| #9 | #6 OR #8                                                                                                                                                                                                                                                                                                                                                                                                                                                                                                                                                                                                                                                                                                                                                                                                                                                                                                                                                                                                                                                                                                                                                                 |

**Table A9: Search terms in Scopus, run 12<sup>th</sup> December 2022**

Scopus (not Medline/Embase records)

AND NOT INDEX ( medline ) OR INDEX ( embase )

|  |                                                                                                                                                                                                                                                                                                                                                                                                                                                                                                                                                                                                                                                                                                                                                                                                                                                                                                                                                                                                                                                          |
|--|----------------------------------------------------------------------------------------------------------------------------------------------------------------------------------------------------------------------------------------------------------------------------------------------------------------------------------------------------------------------------------------------------------------------------------------------------------------------------------------------------------------------------------------------------------------------------------------------------------------------------------------------------------------------------------------------------------------------------------------------------------------------------------------------------------------------------------------------------------------------------------------------------------------------------------------------------------------------------------------------------------------------------------------------------------|
|  | TITLE-ABS-KEY(coronavir* OR "corona virus" OR betacoronavir* OR covid19 OR "covid-19" OR "covid 19" OR COVID2019 OR "COVID 2019" OR "COVID-19" OR nCoV OR "CoV 2" OR CoV2 OR sarscov2 OR 2019nCoV OR "novel CoV" OR "wuhan virus") OR (TITLE-ABS-KEY(wuhan OR hubei OR huanan) AND TITLE-ABS-KEY("severe acute respiratory" OR pneumonia*) AND TITLE-ABS-KEY(outbreak*))                                                                                                                                                                                                                                                                                                                                                                                                                                                                                                                                                                                                                                                                                 |
|  | TITLE-ABS-KEY("first level of care" OR "primary care" OR "primary health care" OR "general practice" OR "general practitioner*" OR "health service*" OR "ambulatory care" OR "continuity of patient care" OR "continuity of care" OR "healthcare system*" OR "health care system*" OR "health policy" OR "health policies" OR "healthcare policy" OR "healthcare policies")<br>OR<br>TITLE-ABS-KEY("disease management" OR "self-manag*" OR "self-care" OR "care, self" OR "self-treat*" OR "self-test*" OR "self-medicat*" OR "self-monitor*" OR "self-diagnos*" OR "self-efficacy" OR "self-competen*")<br>OR<br>TITLE-ABS-KEY("quality of health care" OR "healthcare quality" OR "health care quality" OR "patient acceptance of health care" OR "patient acceptance of healthcare" OR "healthcare utilization" OR "health care utilization" OR "patient compliance" OR "facilities utilization" OR "services utilization" OR "patient care" OR "point of care" OR "universal health care" OR "universal healthcare" OR "information systems")<br>OR |



|  |                                                                                                                                                                                                                                                                                                                                                                                                                                                                                                                                                                                                                                                                                                                                                                                                                                                                                                                                                                                                                                                                                                                                                                                            |
|--|--------------------------------------------------------------------------------------------------------------------------------------------------------------------------------------------------------------------------------------------------------------------------------------------------------------------------------------------------------------------------------------------------------------------------------------------------------------------------------------------------------------------------------------------------------------------------------------------------------------------------------------------------------------------------------------------------------------------------------------------------------------------------------------------------------------------------------------------------------------------------------------------------------------------------------------------------------------------------------------------------------------------------------------------------------------------------------------------------------------------------------------------------------------------------------------------|
|  | <p>TITLE-ABS-KEY("health facility" OR "health facilities" OR "health personnel" OR "health care provider*" OR "healthcare provider*" OR "health care worker*" OR "healthcare worker*" OR "health care professional*" OR "healthcare professional*" OR "health workforce" OR nurse* OR pharmacist* OR physician* OR medication OR "drug supply" OR "drug supplies" OR "health facilit*" OR "medical facilit*" OR "facility infrastructure" OR outpatient* OR budget* OR financial*)</p> <p>OR</p> <p>TITLE-ABS-KEY("resilient health system*" OR "sustainable health system*" OR "health system sustainability" OR "health system resilience" OR "resilient health systems" OR "patient centered care" OR "patient acceptance")</p>                                                                                                                                                                                                                                                                                                                                                                                                                                                         |
|  | <p>TITLE-ABS-KEY(diabetes OR diabetic* OR "glucose intoler*" OR "glucose toler*" OR "blood glucose" OR "blood sugar*" OR "elevated serum glucose level*" OR hyperglycemia* OR hyperglucemia* OR hyperglycaemia* OR IDDM OR MODY OR NIDDM OR T1DM OR T2DM OR prediabet* OR IIDM OR "glycogen storage disease*" OR glycogenoses OR glycogenesis OR "glycosylation disorder*" OR "insulin coma*" OR "insulin resistan*" OR "insulin sensitivit*" OR "insulin shock*" OR "insulin independ*")</p>                                                                                                                                                                                                                                                                                                                                                                                                                                                                                                                                                                                                                                                                                              |
|  | <p>TITLE-ABS-KEY("hypertension*" OR "hyper tension*" OR hypertensive* OR "blood pressure*" OR prehypertens* OR systolic OR systole OR diastolic OR diastole OR "pulse pressure*" OR "noncommunicable diseases" OR "non communicable diseases" OR "antihypertensive*")</p>                                                                                                                                                                                                                                                                                                                                                                                                                                                                                                                                                                                                                                                                                                                                                                                                                                                                                                                  |
|  | <p>TITLE-ABS-KEY("Latin America*" OR Caribbean* OR Aruba* OR Curacao* OR "Sint Maarten*" OR "West Indies*" OR Montserrat* OR Turks* OR Caicos* OR Cayman* OR Antigua* OR Barbuda* OR Bahamas* OR Barbados* OR "British Virgin Island*" OR Cuba* OR Dominica* OR Grenada* OR Guadeloupe* OR Haiti* OR Jamaica* OR Martinique* OR "Puerto Rico*" OR "Puerto Rican*" OR "Saint Kitts*" OR "St Kitts*" OR Nevis* OR "Saint Lucia*" OR "St Lucia*" OR "Saint Vincent*" OR "St Vincent*" OR Grenadines* OR Trinidad* OR Tobago* OR "Virgin Island*" OR "Saint Bart*" OR "St Bart*" OR "Central America*" OR Belize* OR "Costa Rica*" OR "El Salvador*" OR Salvadorean* OR Salvadoran* OR Salvadorian* OR Guatemala* OR Honduras* OR Nicaragua* OR Panama* OR "South America*" OR Argentina* OR Argentine* OR Argentinian* OR Bolivia* OR Brazil* OR Brasil* OR Chile* OR Colombia* OR Ecuador* OR Guyana* OR Guiana* OR Paraguay* OR Peru* OR Suriname* OR Surinam* OR Uruguay* OR Venezuela* OR Mexico* OR Mexican* OR Hispanic* OR Hispano* OR Latin OR Latina* OR Latine* OR Latinu* OR Latino* OR Latinx* OR "Spanish speak*" OR "Spanish America*" OR Boricua* OR Chicana* OR Chicano*)</p> |
|  | #1 AND (#2 OR #3 OR #4) AND #5 AND 2020 – present                                                                                                                                                                                                                                                                                                                                                                                                                                                                                                                                                                                                                                                                                                                                                                                                                                                                                                                                                                                                                                                                                                                                          |
|  | <p>TITLE-ABS-KEY ("health system recovery" OR "post-pandemic" OR "post-pandemic recovery" OR "post-COVID-19 recovery" OR "recovery plan*" OR "health strategy*" OR "reform" OR "disruption recovery")</p>                                                                                                                                                                                                                                                                                                                                                                                                                                                                                                                                                                                                                                                                                                                                                                                                                                                                                                                                                                                  |
|  | #1 AND (#2 OR #3 OR #4) AND #7 AND 2020 – present                                                                                                                                                                                                                                                                                                                                                                                                                                                                                                                                                                                                                                                                                                                                                                                                                                                                                                                                                                                                                                                                                                                                          |
|  | #6 OR #8                                                                                                                                                                                                                                                                                                                                                                                                                                                                                                                                                                                                                                                                                                                                                                                                                                                                                                                                                                                                                                                                                                                                                                                   |
|  | AND NOT (INDEX ( medline ) OR INDEX ( embase ))                                                                                                                                                                                                                                                                                                                                                                                                                                                                                                                                                                                                                                                                                                                                                                                                                                                                                                                                                                                                                                                                                                                                            |

**Table A10: Search terms in LILACS, run 12<sup>th</sup> December 2022**

|                                                                                                                                                                                                                                                                                                                                                                                                                                                                                                                                                                                                                                                                                                                                                                                                                                                                                                                                                                                                                                                                                                                                                                                                                                                                                                                                                                                                                                                                                                                                                                                                                                                                                                                                                                                                                                                                                                                                                                                                                                                                                                                                                                                                                                                                                                                                                                                                                                                                                                                                                                                                                                                                                                                                                                                                                                                                                                                                                                                                                                                                                                                                                                                                                                                                                                                                                                                                                                                                                                                                                                                                                                                                                                                                                                                                                                                                                                                                                                                                                                                                                                                                                                                                                                                                  |
|------------------------------------------------------------------------------------------------------------------------------------------------------------------------------------------------------------------------------------------------------------------------------------------------------------------------------------------------------------------------------------------------------------------------------------------------------------------------------------------------------------------------------------------------------------------------------------------------------------------------------------------------------------------------------------------------------------------------------------------------------------------------------------------------------------------------------------------------------------------------------------------------------------------------------------------------------------------------------------------------------------------------------------------------------------------------------------------------------------------------------------------------------------------------------------------------------------------------------------------------------------------------------------------------------------------------------------------------------------------------------------------------------------------------------------------------------------------------------------------------------------------------------------------------------------------------------------------------------------------------------------------------------------------------------------------------------------------------------------------------------------------------------------------------------------------------------------------------------------------------------------------------------------------------------------------------------------------------------------------------------------------------------------------------------------------------------------------------------------------------------------------------------------------------------------------------------------------------------------------------------------------------------------------------------------------------------------------------------------------------------------------------------------------------------------------------------------------------------------------------------------------------------------------------------------------------------------------------------------------------------------------------------------------------------------------------------------------------------------------------------------------------------------------------------------------------------------------------------------------------------------------------------------------------------------------------------------------------------------------------------------------------------------------------------------------------------------------------------------------------------------------------------------------------------------------------------------------------------------------------------------------------------------------------------------------------------------------------------------------------------------------------------------------------------------------------------------------------------------------------------------------------------------------------------------------------------------------------------------------------------------------------------------------------------------------------------------------------------------------------------------------------------------------------------------------------------------------------------------------------------------------------------------------------------------------------------------------------------------------------------------------------------------------------------------------------------------------------------------------------------------------------------------------------------------------------------------------------------------------------------------------|
| <p>((MH:C01.925.782.600.550.200\$ OR MH:B04.820.578.500.540.150.113.968\$ OR MH:B04.820.578.500.540.150\$ OR MH:B04.820.578.500.540.150.113\$ OR MH:E01.370.225.312\$ OR MH:E05.200.312\$ OR MH:D20.215.894.899.085\$ OR "COVID-19" OR "COVID 19" OR "COVID19" OR "COVID2019" OR "COVID 2019" OR "COVID-2019" OR "novel coronavirus" OR "new coronavirus" OR "novel corona virus" OR "new corona virus" OR "SARS-CoV-2" OR "SARSCoV2" OR "SARS-CoV2" OR "2019nCoV" OR "2019-nCoV" OR "2019 coronavirus" OR "2019 corona virus" OR "coronavirus disease 2019" OR "corona virus disease 2019" OR "severe acute respiratory syndrome coronavirus 2" OR "sars-coronavirus-2" OR "SARS Coronavirus 2" OR "coronavirus disease 19" OR "corona virus disease 19" OR coronavirus OR "corona virus" OR coronavirinae OR coronaviridae OR betacoronavirus OR nCoV OR "CoV 2" OR CoV2 OR sarscov2 OR "novel CoV" OR "wuhan virus") OR ((wuhan OR hubei OR huanan) AND ("severe acute respiratory" OR pneumonia) AND (outbreak))) AND ((MH:N04.590.233.727\$ OR MH:SP2.630.121\$ OR MH:H02.403.340\$ OR MH:M01.526.485.810.485\$ OR MH:N02.360.810.485\$ OR MH:N02.421\$ OR MH:SH1.030.010.050\$ OR MH:SP2.840\$ OR MH:SP9.242.315.475.901\$ OR MH:VS3.001\$ OR MH:N04.590.233.727\$ OR MH:SP2.630.121\$ OR MH:M01.526.485.810.800\$ OR MH:N02.360.810.795\$ OR MH:E02.760.106\$ OR MH:N02.421.585.106\$ OR MH:SP2.840.013\$ OR MH:VS3.003.001.001\$ OR MH:E02.760.169\$ OR MH:N02.421.585.169\$ OR MH:N04.590.233.727.210\$ OR MH:I01.655.500.608.400\$ OR MH:I01.880.604.825.608.400\$ OR MH:N03.623.500.608.428\$ OR MH:SH1.010.010.030\$ OR MH:SP1.852\$ OR MH:VS1.001.004\$ OR MH:N04.590.374\$ OR MH:N05.300\$ OR MH:SP2\$ OR MH:VS3.003\$ OR "first level of care" OR "primary care" OR "primary health care" OR "general practice" OR "general practitioner" OR "health service" OR "health services" OR "ambulatory care" OR "continuity of patient care" OR "continuity of care" OR "healthcare system" OR "healthcare systems" OR "health care system" OR "health care systems" OR "health policy" OR "health policies" OR "healthcare policy" OR "healthcare policies") OR (MH:N04.590.607\$ OR MH:N02.421.784.760\$ OR MH:E02.900\$ OR MH:I03.050.563\$ OR MH:N02.421.784.680\$ OR "disease management" OR "self-manage" OR "self-care" OR "self-treatment" OR "self-test" OR "self-medication" OR "self-monitor" OR "self-diagnosis" OR "self-efficacy" OR "self-competent" OR MH:N04.761\$ OR MH:N05.715\$ OR MH:SP2.700\$ OR MH:SP9.242.315.475.156.909\$ OR MH:VS3.003.002\$ OR MH:F01.100.150.750.500\$ OR MH:F01.145.488.887.500\$ OR MH:N05.300.150.800.500\$ OR MH:N04.590\$ OR MH:N03.706.871\$ OR MH:N04.590.374.350.875\$ OR MH:N04.940\$ OR MH:E05.318.740.388\$ OR MH:H01.548.832.625\$ OR MH:N04.452.289\$ OR MH:N05.715.360.750.344\$ OR MH:N06.850.520.830.375\$ OR MH:N04.452.515\$ OR "Quality of Health Care" OR "healthcare quality" OR "health care quality" OR "healthcare utilization" OR "health care utilization" OR "patient compliance" OR "Facilities Utilization" OR "Services Utilization" OR "Patient Care" OR "point of care" OR "Universal Health Care" OR "Universal Healthcare" OR "Information Systems") OR (MH:N02.278\$ OR MH:VS3.001.001.001.001\$ OR MH:VS3.002\$ OR MH:M01.526.485\$ OR MH:N02.360\$ OR MH:SH1.030.020.020.010\$ OR MH:VS3.004.001\$ OR MH:N02.350\$ OR MH:N04.452.525.500\$ OR MH:N05.300.420.400\$ OR MH:SH1.030.020.020\$ OR MH:SP1.101.750.121\$ OR MH:VS3.004\$ OR MH:L01.313.500.750.300.361\$ OR MH:N03.219.463.060\$ OR MH:N02.278.216.500.875\$ OR MH:N03.219.463.280\$ OR MH:N04.452.442.452.180\$ OR "health facility" OR "health facilities" OR "health personnel" OR "health care provider" OR "health care providers" OR "healthcare provider" OR "healthcare providers" OR "health care worker" OR "health care workers" OR "healthcare worker" OR "healthcare workers" OR "health care professional" OR "health care professionals" OR "healthcare professional" OR "healthcare professionals" OR "health workforce" OR nurse* OR pharmacist* OR physician* OR medication OR "drug supply" OR "drug supplies" OR "health facility" OR "health facilities" OR "medical facility" OR</p> |
|------------------------------------------------------------------------------------------------------------------------------------------------------------------------------------------------------------------------------------------------------------------------------------------------------------------------------------------------------------------------------------------------------------------------------------------------------------------------------------------------------------------------------------------------------------------------------------------------------------------------------------------------------------------------------------------------------------------------------------------------------------------------------------------------------------------------------------------------------------------------------------------------------------------------------------------------------------------------------------------------------------------------------------------------------------------------------------------------------------------------------------------------------------------------------------------------------------------------------------------------------------------------------------------------------------------------------------------------------------------------------------------------------------------------------------------------------------------------------------------------------------------------------------------------------------------------------------------------------------------------------------------------------------------------------------------------------------------------------------------------------------------------------------------------------------------------------------------------------------------------------------------------------------------------------------------------------------------------------------------------------------------------------------------------------------------------------------------------------------------------------------------------------------------------------------------------------------------------------------------------------------------------------------------------------------------------------------------------------------------------------------------------------------------------------------------------------------------------------------------------------------------------------------------------------------------------------------------------------------------------------------------------------------------------------------------------------------------------------------------------------------------------------------------------------------------------------------------------------------------------------------------------------------------------------------------------------------------------------------------------------------------------------------------------------------------------------------------------------------------------------------------------------------------------------------------------------------------------------------------------------------------------------------------------------------------------------------------------------------------------------------------------------------------------------------------------------------------------------------------------------------------------------------------------------------------------------------------------------------------------------------------------------------------------------------------------------------------------------------------------------------------------------------------------------------------------------------------------------------------------------------------------------------------------------------------------------------------------------------------------------------------------------------------------------------------------------------------------------------------------------------------------------------------------------------------------------------------------------------------------------------------|

"medical facilities" OR "facility infrastructure" OR outpatient\* OR budget\* OR financial\* OR "resilient health system" OR "resilient health systems" OR "sustainable health system" OR "sustainable health systems" OR "health system sustainability" OR "health system resilience" OR "resilient health systems" OR "patient centered care" OR "patient acceptance") OR (MH:C18.452.394\$ OR MH:C16.320.565.202.449\$ OR MH:C18.452.648.202.449\$ OR MH:C18.452.394.968.500\$ OR MH:G07.690.773.984.617\$ OR MH:D09.947.875.359.448.500\$ OR MH:E01.370.225.124.100.355\$ OR MH:E01.370.374.355\$ OR MH:E05.200.124.100.355\$ OR Diabetes OR diabetic\* OR "glucose intolerant" OR "glucose tolerance" OR "blood glucose" OR "blood sugar" OR "blood sugars" OR "elevated serum glucose level" OR "elevated serum glucose levels " OR hyperglycemia\* OR hyperglucemia\* OR hyperglycaemia\* OR IDDM OR MODY OR NIDDM OR T1DM OR T2DM OR prediabet\* OR IIDM OR "glycogen storage disease" OR glycogenoses OR glycogenosis OR "glycosylation disorder" OR "glycosylation disorders" OR "insulin coma" OR "insulin resistant" OR "insulin sensitivity" OR "insulin shock" OR "insulin independant") OR (MH:C14.907.489\$ OR MH:C14.907.653\$ OR MH:E01.370.600.875.249\$ OR MH:G09.330.380.076\$ OR MH:C23.550.291.898\$ OR MH:D27.505.954.411.162\$ OR hypertension\* OR "hyper tension" OR hypertensive\* OR "blood pressure" OR prehypertensi\* OR systolic OR systole OR diastolic OR diastole OR "pulse pressure" OR "Noncommunicable Diseases" OR "Non communicable Diseases" OR Antihypertensive\*))

AND (year\_cluster:[2020 TO 2023])
